# Supplementary material for: The Effect of Acute Oral Galactose Administration on the Redox System of the Rat Small Intestine
Source: MDPI journal article supplement (doi:10.3390/antiox11010037), 2021-12-24
Supplement: s1 [file s1]

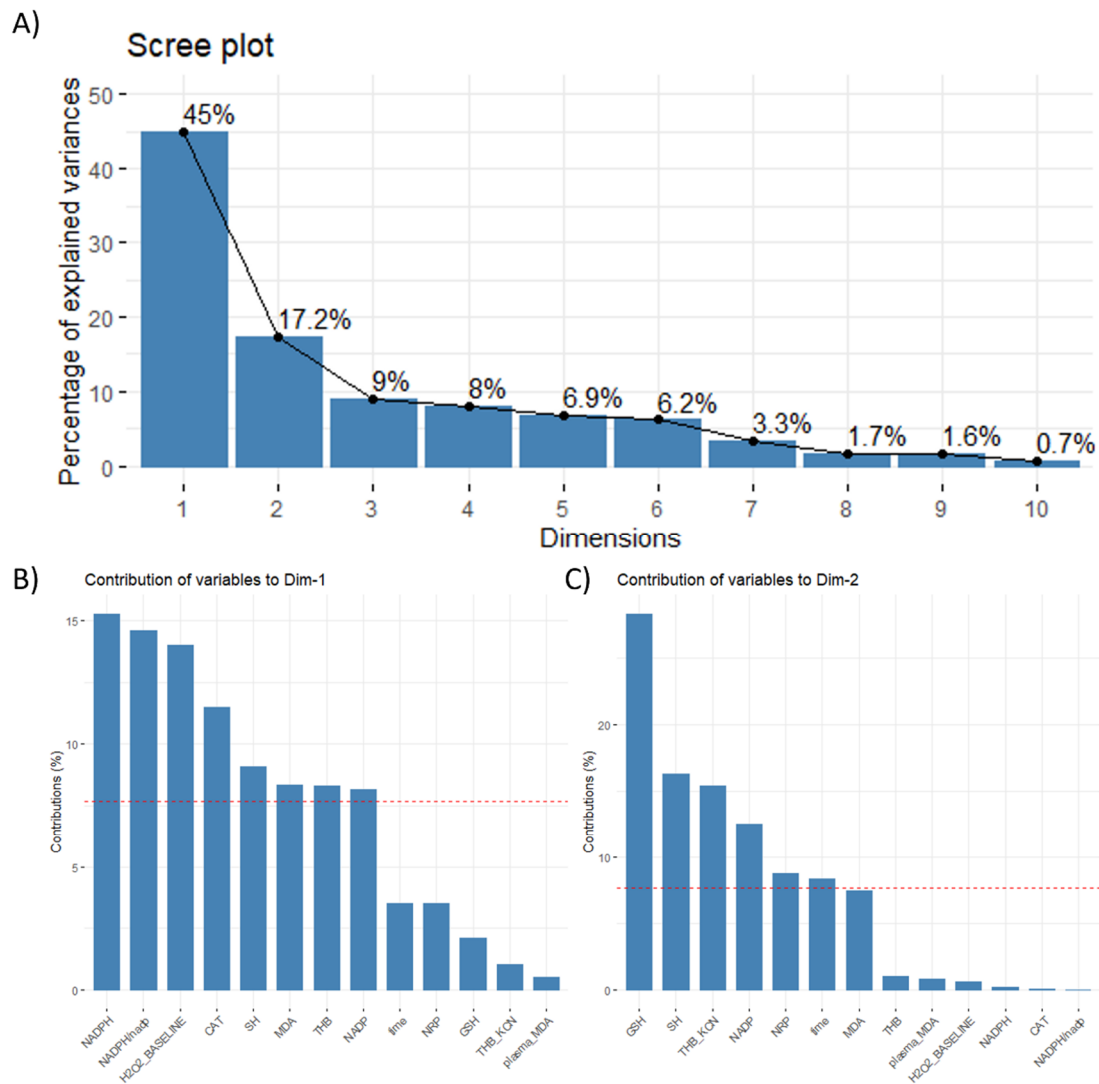

**Figure S1.** Combined intestinal redox-related parameters principal component analysis. (A) Scree plot. (B) Contribution of individual variables to the 1<sup>st</sup> principal component. (C) Contribution of individual variables to the 2<sup>nd</sup> principal component. NRP – nitrocellulose redox permanganometry; time – minutes since the exposure to treatment (continuous variable); THB\_KCN – change in 1,2,3-trihydroxybenzene autooxidation rate in the presence of 2mM potassium cyanide (KCN); GSH – glutathione (the main representative of the low molecular weight thiols (LMWT)); MDA – malondialdehyde (the main representative of the thiobarbituric acid reactive substances (TBARS)); NADP – nicotinamide adenine dinucleotide phosphate; THB – change in 1,2,3-trihydroxybenzene autooxidation rate; CAT – catalase activity (hydrogen peroxide dissociation rate); H2O2\_BASELINE – estimated baseline levels of tissue hydrogen peroxide; SH – protein reactive sulfhydryl groups; NADPH – reduced nicotinamide adenine dinucleotide phosphate; NADPH/nadp – the concentration of reduced nicotinamide adenine dinucleotide phosphate corrected for concentration of nicotinamide adenine dinucleotide phosphate; contrib – contribution of variables; Dim1 – 1<sup>st</sup> dimension; Dim2 – 2<sup>nd</sup> dimension.

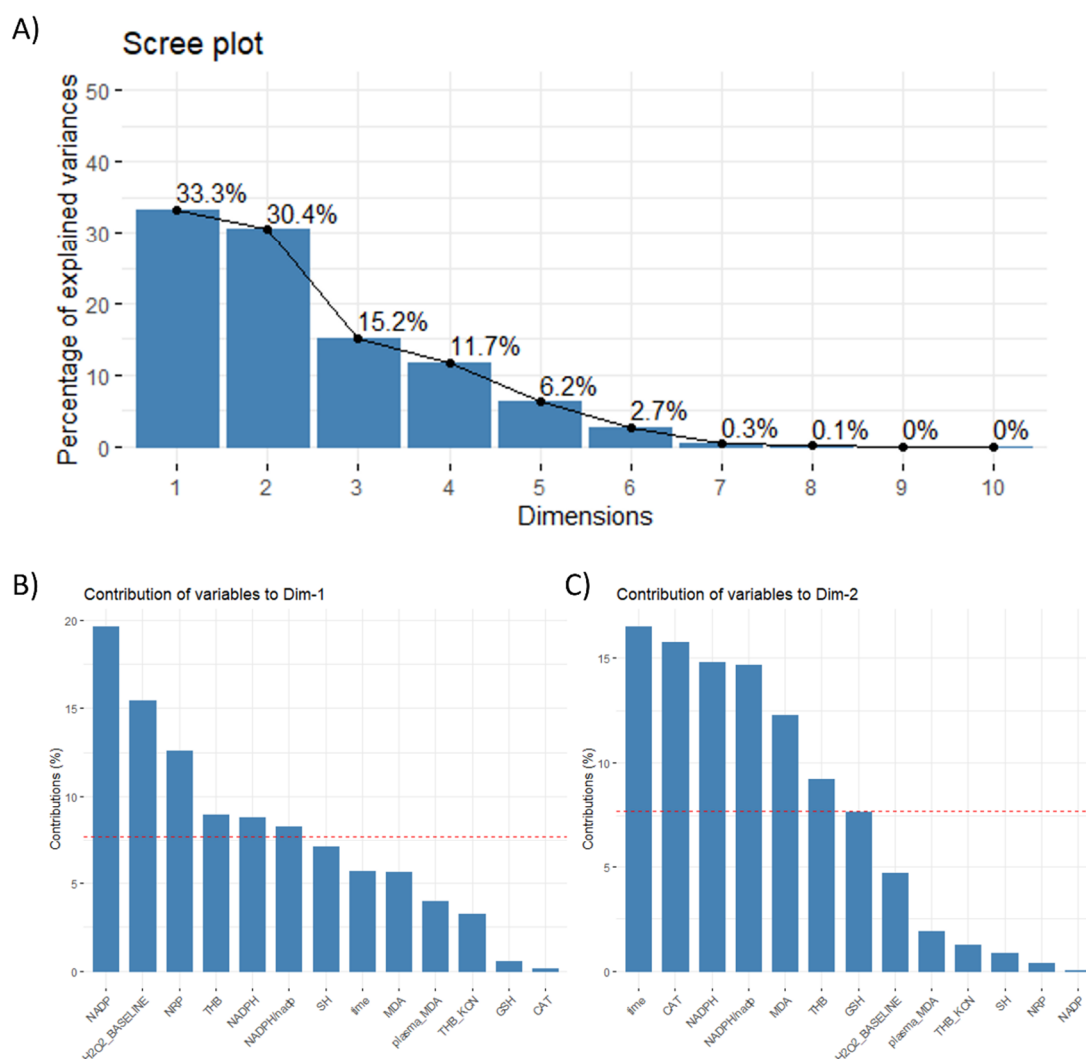

**Figure S2.** Duodenal redox-related parameters principal component analysis. **(A)** Scree plot. **(B)** Contribution of individual variables to the 1st principal component. **(C)** Contribution of individual variables to the 2nd principal component. NRP – nitrocellulose redox permanganometry; time – minutes since the exposure to treatment (continuous variable); THB\_KCN – change in 1,2,3-trihydroxybenzene autooxidation rate in the presence of 2mM potassium cyanide (KCN); GSH – glutathione (the main representative of the low molecular weight thiols (LMWT)); MDA – malondialdehyde (the main representative of the thiobarbituric acid reactive substances (TBARS)); NADP – nicotinamide adenine dinucleotide phosphate; THB – change in 1,2,3-trihydroxybenzene autooxidation rate; CAT – catalase activity (hydrogen peroxide dissociation rate); H2O2\_BASELINE – estimated baseline levels of tissue hydrogen peroxide; SH – protein reactive sulfhydryl groups; NADPH – reduced nicotinamide adenine dinucleotide phosphate; NADPH/nadp – the concentration of reduced nicotinamide adenine dinucleotide phosphate corrected for concentration of nicotinamide adenine dinucleotide phosphate; contrib – contribution of variables; Dim1 – 1st dimension; Dim2 – 2nd dimension.

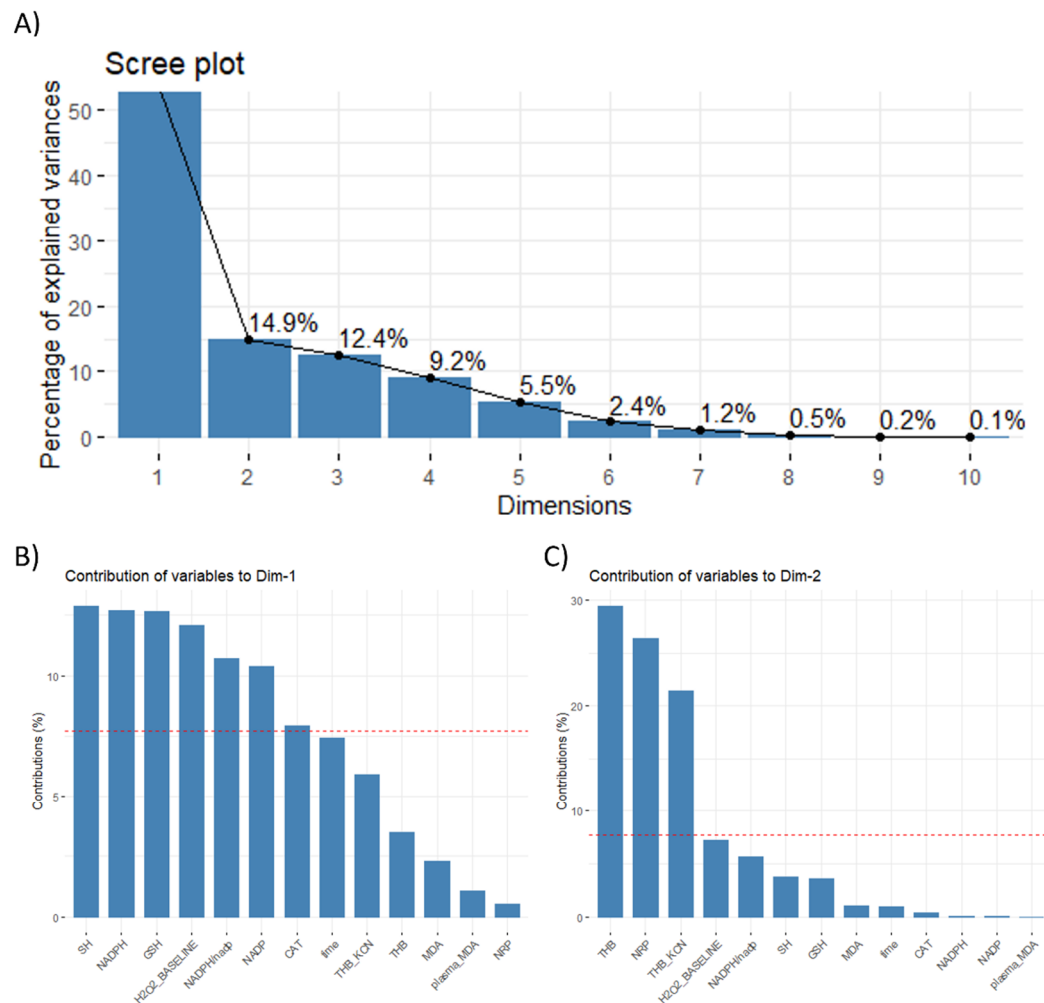

**Figure S3.** Ileal redox-related parameters principal component analysis. **(A)** Scree plot. **(B)** Contribution of individual variables to the 1st principal component. **(C)** Contribution of individual variables to the 2nd principal component. NRP – nitrocellulose redox permanganometry; time – minutes since the exposure to treatment (continuous variable); THB\_KCN – change in 1,2,3-trihydroxybenzene autooxidation rate in the presence of 2mM potassium cyanide (KCN); GSH – glutathione (the main representative of the low molecular weight thiols (LMWT)); MDA – malondialdehyde (the main representative of the thiobarbituric acid reactive substances (TBARS)); NADP – nicotinamide adenine dinucleotide phosphate; THB – change in 1,2,3-trihydroxybenzene autooxidation rate; CAT – catalase activity (hydrogen peroxide dissociation rate); H2O2\_BASELINE – estimated baseline levels of tissue hydrogen peroxide; SH – protein reactive sulfhydryl groups; NADPH – reduced nicotinamide adenine dinucleotide phosphate; NADPH/nadp – the concentration of reduced nicotinamide adenine dinucleotide phosphate corrected for concentration of nicotinamide adenine dinucleotide phosphate; contrib – contribution of variables; Dim1 – 1st dimension; Dim2 – 2nd dimension.
